# Supplementary material
Source: MDPI journal article supplement (https://www.mdpi.com/2073-4395/12/10/2567)
Supplement: s1 [file s1]

Table S1. SNP locations associated with Bakanae disease resistance in 145 BC<sub>1</sub>F<sub>8</sub> NILs rice accession

| Chr | SNP          | QTL           |                        |         |          |          |        |        | GWAS                  |       |                       |
|-----|--------------|---------------|------------------------|---------|----------|----------|--------|--------|-----------------------|-------|-----------------------|
|     |              | Location (bp) | P-value                | Alleles | LOD      | PVE (%)  | ADD    | DOM    | P-value               | MAF   | FDR adjusted P-values |
| 4   | AX-154456463 | 32680144      | 3.85×10 <sup>-13</sup> | A/G     | 12.6697  | 33.5031  | 15.521 | -3.706 | 1.10×10 <sup>-7</sup> | 0.189 | 1.15×10 <sup>-4</sup> |
| 4   | AX-155457864 | 32684063      | 3.48×10 <sup>-13</sup> | C/G     | 12.7250  | 33.62142 | 15.432 | -3.802 | 1.10×10 <sup>-7</sup> | 0.189 | 1.15×10 <sup>-4</sup> |
| 4   | AX-155643680 | 32692499      | 3.48×10 <sup>-13</sup> | T/C     | 12.72507 | 33.62157 | 15.432 | -3.802 | 1.10×10 <sup>-7</sup> | 0.189 | 1.15×10 <sup>-4</sup> |
| 4   | AX-155569480 | 32692779      | 3.48×10 <sup>-13</sup> | A/G     | 12.72507 | 33.62157 | 15.432 | -3.802 | 1.10×10 <sup>-7</sup> | 0.189 | 1.15×10 <sup>-4</sup> |
| 4   | AX-154227101 | 32693069      | 3.48×10 <sup>-13</sup> | A/G     | 12.72507 | 33.62157 | 15.432 | -3.802 | 2.03×10 <sup>-6</sup> | 0.175 | 1.06×10 <sup>-2</sup> |
| 4   | AX-154207393 | 32694044      | 3.48×10 <sup>-13</sup> | A/G     | 12.72507 | 33.62157 | 15.432 | -3.802 | 1.51×10 <sup>-6</sup> | 0.185 | 8.18×10 <sup>-4</sup> |
| 4   | AX-154867748 | 32697251      | 3.48×10 <sup>-13</sup> | A/G     | 12.72508 | 33.62158 | 15.432 | -3.802 | 1.10×10 <sup>-7</sup> | 0.189 | 1.15×10 <sup>-4</sup> |
| 4   | AX-154464630 | 32698120      | 3.48×10 <sup>-13</sup> | A/G     | 12.72508 | 33.62158 | 15.432 | -3.802 | 1.10×10 <sup>-7</sup> | 0.189 | 1.15×10 <sup>-4</sup> |
| 4   | AX-115770324 | 32698675      | 3.48×10 <sup>-13</sup> | A/G     | 12.72508 | 33.62158 | 15.432 | -3.802 | 1.10×10 <sup>-7</sup> | 0.189 | 1.15×10 <sup>-4</sup> |
| 4   | AX-154041676 | 32700160      | 3.48×10 <sup>-13</sup> | A/G     | 12.72508 | 33.62158 | 15.432 | -3.802 | 1.10×10 <sup>-7</sup> | 0.189 | 1.15×10 <sup>-4</sup> |
| 4   | AX-153976092 | 32700345      | 3.48×10 <sup>-13</sup> | T/G     | 12.72508 | 33.62158 | 15.432 | -3.802 | 1.10×10 <sup>-7</sup> | 0.189 | 1.15×10 <sup>-4</sup> |
| 4   | AX-153967607 | 32701381      | 3.48×10 <sup>-13</sup> | A/G     | 12.72508 | 33.62158 | 15.432 | -3.802 | 1.10×10 <sup>-7</sup> | 0.189 | 1.15×10 <sup>-4</sup> |
| 4   | AX-155026251 | 32702259      | 3.48×10 <sup>-13</sup> | T/C     | 12.72508 | 33.62158 | 15.432 | -3.802 | 1.10×10 <sup>-7</sup> | 0.189 | 1.15×10 <sup>-4</sup> |
| 4   | AX-123175709 | 32703634      | 3.48×10 <sup>-13</sup> | A/G     | 12.72508 | 33.62158 | 15.432 | -3.802 | 1.60×10 <sup>-7</sup> | 0.192 | 1.60×10 <sup>-4</sup> |
| 4   | AX-115809276 | 32704277      | 3.48×10 <sup>-13</sup> | A/G     | 12.7251  | 33.62162 | 15.432 | -3.802 | 2.03×10 <sup>-6</sup> | 0.175 | 1.06×10 <sup>-2</sup> |
| 4   | AX-154695547 | 32723043      | 3.48×10 <sup>-13</sup> | A/G     | 12.72508 | 33.62158 | 15.432 | -3.802 | 1.10×10 <sup>-7</sup> | 0.189 | 1.15×10 <sup>-4</sup> |
| 4   | AX-154859271 | 32724312      | 3.48×10 <sup>-13</sup> | C/G     | 12.72508 | 33.62158 | 15.432 | -3.802 | 1.10×10 <sup>-7</sup> | 0.189 | 1.15×10 <sup>-4</sup> |
| 4   | AX-280767943 | 32725987      | 3.48×10 <sup>-13</sup> | C/G     | 12.72508 | 33.62158 | 15.432 | -3.802 | 1.10×10 <sup>-7</sup> | 0.189 | 1.15×10 <sup>-4</sup> |
| 4   | AX-154211953 | 32728366      | 3.48×10 <sup>-13</sup> | C/G     | 12.72508 | 33.62158 | 15.432 | -3.802 | 1.10×10 <sup>-7</sup> | 0.189 | 1.15×10 <sup>-4</sup> |
| 4   | AX-115803330 | 32728736      | 3.48×10 <sup>-13</sup> | A/G     | 12.72508 | 33.62158 | 15.432 | -3.802 | 1.10×10 <sup>-7</sup> | 0.189 | 1.15×10 <sup>-4</sup> |
| 4   | AX-155137483 | 32728802      | 3.48×10 <sup>-13</sup> | A/G     | 12.72508 | 33.62158 | 15.432 | -3.802 | 1.10×10 <sup>-7</sup> | 0.189 | 1.15×10 <sup>-4</sup> |

|   |              |          |                        |       |          |          |        |        |                       |       |                       |
|---|--------------|----------|------------------------|-------|----------|----------|--------|--------|-----------------------|-------|-----------------------|
| 4 | AX-154410587 | 32730787 | $3.48 \times 10^{-13}$ | T/C   | 12.72508 | 33.62158 | 15.432 | -3.802 | $1.10 \times 10^{-7}$ | 0.189 | $1.15 \times 10^{-4}$ |
| 4 | AX-277623309 | 32733857 | $3.48 \times 10^{-13}$ | T/C   | 12.72508 | 33.62158 | 15.432 | -3.802 | $1.10 \times 10^{-7}$ | 0.189 | $1.15 \times 10^{-4}$ |
| 4 | AX-155124026 | 32750909 | $3.48 \times 10^{-13}$ | C/G   | 12.7252  | 33.62185 | 15.432 | -3.803 | $1.10 \times 10^{-7}$ | 0.189 | $1.15 \times 10^{-4}$ |
| 4 | AX-115778528 | 32754396 | $3.47 \times 10^{-13}$ | T/C   | 12.73024 | 33.63261 | 15.456 | -3.82  | $1.10 \times 10^{-7}$ | 0.189 | $1.15 \times 10^{-4}$ |
| 4 | AX-115857163 | 32939206 | $3.46 \times 10^{-13}$ | A/T   | 12.8266  | 33.83825 | 17.23  | -5.184 | $1.10 \times 10^{-7}$ | 0.189 | $1.15 \times 10^{-4}$ |
| 4 | AX-154526320 | 32975130 | $4.20 \times 10^{-12}$ | T/C   | 11.61989 | 31.21653 | 15.106 | -3.811 | $1.02 \times 10^{-6}$ | 0.182 | $5.64 \times 10^{-4}$ |
| 4 | AX-115781967 | 33019561 | $4.20 \times 10^{-12}$ | A/G   | 11.61989 | 31.21654 | 15.106 | -3.811 | $1.02 \times 10^{-6}$ | 0.182 | $5.64 \times 10^{-4}$ |
| 4 | AX-115837545 | 33019626 | $4.20 \times 10^{-12}$ | A/C   | 11.61989 | 31.21654 | 15.106 | -3.811 | $1.02 \times 10^{-6}$ | 0.182 | $5.64 \times 10^{-4}$ |
| 4 | AX-116847364 | 33120818 | $1.52 \times 10^{-13}$ | T/C   | 13.09056 | 34.39828 | 15.422 | -9.976 | $4.00 \times 10^{-8}$ | 0.192 | $1.16 \times 10^{-4}$ |
| 4 | AX-115795908 | 33157662 | $1.52 \times 10^{-13}$ | T/C   | 13.09154 | 34.40034 | 15.421 | -9.975 | $4.00 \times 10^{-8}$ | 0.192 | $1.16 \times 10^{-4}$ |
| 4 | AX-155106847 | 33255350 | $1.88 \times 10^{-12}$ | T/C   | 11.97587 | 32.00056 | 15.099 | -9.987 | $3.80 \times 10^{-7}$ | 0.185 | $2.26 \times 10^{-4}$ |
| 4 | AX-95924423  | 33255483 | $1.88 \times 10^{-12}$ | A/C   | 11.97577 | 32.00034 | 15.099 | -9.987 | $3.80 \times 10^{-7}$ | 0.185 | $2.26 \times 10^{-4}$ |
| 4 | AX-153967133 | 33255660 | $1.88 \times 10^{-12}$ | -/CTT | 11.97577 | 32.00034 | 15.099 | -9.987 | $3.80 \times 10^{-7}$ | 0.185 | $2.26 \times 10^{-4}$ |
| 4 | AX-155122580 | 33255884 | $1.88 \times 10^{-12}$ | A/C   | 11.97577 | 32.00034 | 15.099 | -9.987 | $3.80 \times 10^{-7}$ | 0.185 | $2.26 \times 10^{-4}$ |
| 4 | AX-154130774 | 33256631 | $1.88 \times 10^{-12}$ | T/C   | 11.97577 | 32.00034 | 15.099 | -9.987 | $3.80 \times 10^{-7}$ | 0.189 | $2.26 \times 10^{-4}$ |
| 4 | AX-154130795 | 33257886 | $1.88 \times 10^{-12}$ | A/T   | 11.97577 | 32.00034 | 15.099 | -9.987 | $3.80 \times 10^{-7}$ | 0.185 | $2.26 \times 10^{-4}$ |
| 4 | AX-154826269 | 33258736 | $1.88 \times 10^{-12}$ | A/C   | 11.97577 | 32.00034 | 15.099 | -9.987 | $3.80 \times 10^{-7}$ | 0.185 | $2.26 \times 10^{-4}$ |
| 4 | AX-280775256 | 33263866 | $1.88 \times 10^{-12}$ | T/C   | 11.97577 | 32.00034 | 15.099 | -9.987 | $3.80 \times 10^{-7}$ | 0.185 | $2.26 \times 10^{-4}$ |
| 4 | AX-154030405 | 33294692 | $1.88 \times 10^{-12}$ | T/C   | 11.97577 | 32.00034 | 15.099 | -9.987 | $3.80 \times 10^{-7}$ | 0.185 | $2.26 \times 10^{-4}$ |
| 4 | AX-155228100 | 33298292 | $1.88 \times 10^{-12}$ | C/G   | 11.97577 | 32.00034 | 15.099 | -9.987 | $3.80 \times 10^{-7}$ | 0.185 | $2.26 \times 10^{-4}$ |
| 4 | AX-282573566 | 33299634 | $1.88 \times 10^{-12}$ | A/G   | 11.97577 | 32.00034 | 15.099 | -9.987 | $3.80 \times 10^{-7}$ | 0.185 | $2.26 \times 10^{-4}$ |
| 4 | AX-154826282 | 33302930 | $1.88 \times 10^{-12}$ | T/C   | 11.97577 | 32.00034 | 15.099 | -9.987 | $3.80 \times 10^{-7}$ | 0.185 | $2.26 \times 10^{-4}$ |
| 4 | AX-155899950 | 33302944 | $1.88 \times 10^{-12}$ | T/G   | 11.97577 | 32.00034 | 15.099 | -9.987 | $3.80 \times 10^{-7}$ | 0.185 | $2.26 \times 10^{-4}$ |
| 4 | AX-154927677 | 33304174 | $1.88 \times 10^{-12}$ | T/C   | 11.97577 | 32.00034 | 15.099 | -9.987 | $3.80 \times 10^{-7}$ | 0.185 | $2.26 \times 10^{-4}$ |
| 4 | AX-155518964 | 33304435 | $1.88 \times 10^{-12}$ | T/G   | 11.97577 | 32.00034 | 15.099 | -9.987 | $3.80 \times 10^{-7}$ | 0.185 | $2.26 \times 10^{-4}$ |
| 4 | AX-155298280 | 33305510 | $1.88 \times 10^{-12}$ | T/G   | 11.97577 | 32.00034 | 15.099 | -9.987 | $3.80 \times 10^{-7}$ | 0.185 | $2.26 \times 10^{-4}$ |

|   |              |          |                        |     |          |          |        |         |                       |       |                       |
|---|--------------|----------|------------------------|-----|----------|----------|--------|---------|-----------------------|-------|-----------------------|
| 4 | AX-155606904 | 33309100 | $1.88 \times 10^{-12}$ | A/G | 11.97577 | 32.00034 | 15.099 | -9.987  | $3.80 \times 10^{-7}$ | 0.185 | $2.26 \times 10^{-4}$ |
| 4 | AX-154734946 | 33310615 | $1.88 \times 10^{-12}$ | T/C | 11.97577 | 32.00034 | 15.099 | -9.987  | $3.80 \times 10^{-7}$ | 0.185 | $2.26 \times 10^{-4}$ |
| 4 | AX-153906354 | 33310648 | $1.88 \times 10^{-12}$ | A/G | 11.97577 | 32.00034 | 15.099 | -9.987  | $3.80 \times 10^{-7}$ | 0.185 | $2.26 \times 10^{-4}$ |
| 4 | AX-155204538 | 33314382 | $1.88 \times 10^{-12}$ | T/C | 11.97577 | 32.00034 | 15.099 | -9.987  | $3.80 \times 10^{-7}$ | 0.185 | $2.26 \times 10^{-4}$ |
| 4 | AX-154202303 | 33315211 | $1.88 \times 10^{-12}$ | T/G | 11.97578 | 32.00037 | 15.099 | -9.987  | $3.80 \times 10^{-7}$ | 0.185 | $2.26 \times 10^{-4}$ |
| 4 | AX-115830678 | 33319178 | $1.86 \times 10^{-12}$ | T/C | 11.98702 | 32.02498 | 15.101 | -9.988  | $2.63 \times 10^{-6}$ | 0.171 | $1.35 \times 10^{-3}$ |
| 4 | AX-115794876 | 33327427 | $1.57 \times 10^{-13}$ | T/C | 13.07659 | 34.36876 | 15.435 | -9.991  | $4.00 \times 10^{-8}$ | 0.192 | $1.16 \times 10^{-4}$ |
| 4 | AX-115810975 | 33398234 | $1.51 \times 10^{-13}$ | A/C | 13.09366 | 34.40483 | 15.419 | -9.972  | $4.00 \times 10^{-8}$ | 0.192 | $1.16 \times 10^{-4}$ |
| 4 | AX-155532569 | 33400434 | $1.51 \times 10^{-13}$ | A/C | 13.09367 | 34.40484 | 15.419 | -9.972  | $4.00 \times 10^{-8}$ | 0.192 | $1.16 \times 10^{-4}$ |
| 4 | AX-115752415 | 33445369 | $1.51 \times 10^{-13}$ | T/C | 13.10462 | 34.42797 | 15.473 | -10.016 | $4.00 \times 10^{-8}$ | 0.192 | $1.16 \times 10^{-4}$ |

---

Chr., Chromosome; MAF, minor allele frequency
